# Supplementary material
Source: Copernicus journal article supplement (doi:10.5194/acp-26-9679-2026)
Supplement: Supplementary file 1 [file acp-26-9679-2026-supplement.pdf]

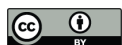

*Supplement of*

## **The impact of CO on secondary organic aerosols formed from the mixture of $\alpha$ -pinene and *n*-dodecane**

**Guangzhao Xie et al.**

*Correspondence to:* Aristeidis Voliotis ([aristeidis.voliotis@manchester.ac.uk](mailto:aristeidis.voliotis@manchester.ac.uk)) and Gordon McFiggans ([g.mcfiggans@manchester.ac.uk](mailto:g.mcfiggans@manchester.ac.uk))

The copyright of individual parts of the supplement might differ from the article licence.

## 1 OH concentration estimation

OH concentrations were estimated from the temporal evolution of O<sub>3</sub> and the consumption of precursors, or alternatively from the depletion of CO.

Based on the consumption of  $\alpha$ -pinene or n-dodecane:

$$[OH] = \frac{\frac{[VOC]_i - [VOC]_{i+1}}{\Delta t} - k_{VOC+O_3}[VOC]_i[O_3]}{k_{VOC+OH}[VOC]_i}$$

Based on the decay of CO:

$$[OH] = \frac{[CO]_i - [CO]_{i+1}}{k_{CO+OH}[CO]_i\Delta t}$$

where  $k_{VOC+O_3}$  and  $k_{VOC+OH}$  denote the reaction rate coefficient of VOC with O<sub>3</sub> and OH, respectively. The reaction rate coefficients for  $\alpha$ -pinene and n-dodecane with OH are  $5.33 \times 10^{-11}$  and  $1.32 \times 10^{-11}$  cm<sup>3</sup> molecule<sup>-1</sup> s<sup>-1</sup>, respectively (Atkinson, 2003; Dash et al., 2014). The reaction rate coefficient for  $\alpha$ -pinene with O<sub>3</sub> is  $9.6 \times 10^{-17}$  cm<sup>3</sup> molecule<sup>-1</sup> s<sup>-1</sup> (Cox et al., 2020).

**Table S1.** Instrument availability for each experiment.

| Experiment Type       | Experiment No. | FIGAERO-CIMS | C-ToF-AMS | PTR-ToF-MS | Gas analysers |
|-----------------------|----------------|--------------|-----------|------------|---------------|
| $\alpha$ -pinene      | 1              | ×            | √         | √          | √             |
| $\alpha$ -pinene      | 2              | √            | √         | √          | √             |
| $\alpha$ -pinene + CO | 3              | √ (2 cycles) | √         | √          | √             |
| n-dodecane            | 4              | ×            | √         | ×          | √             |
| n-dodecane            | 5              | √            | √         | √          | √             |
| n-dodecane + CO       | 6              | √            | √         | √          | √             |
| n-dodecane + CO       | 7              | √            | √         | √          | √             |
| mixture               | 8              | √            | √         | ×          | √             |
| mixture               | 9              | √            | √         | √          | √             |
| mixture + CO          | 10             | √            | √         | √          | √             |
| mixture + CO          | 11             | ×            | √         | √          | √             |

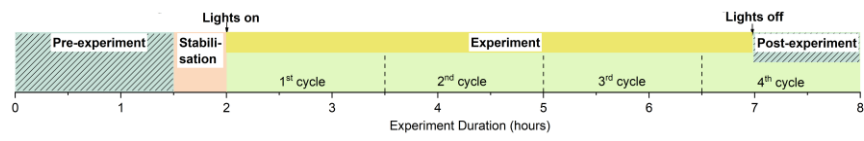

**Figure S1: Schematic of the experimental timeline.**

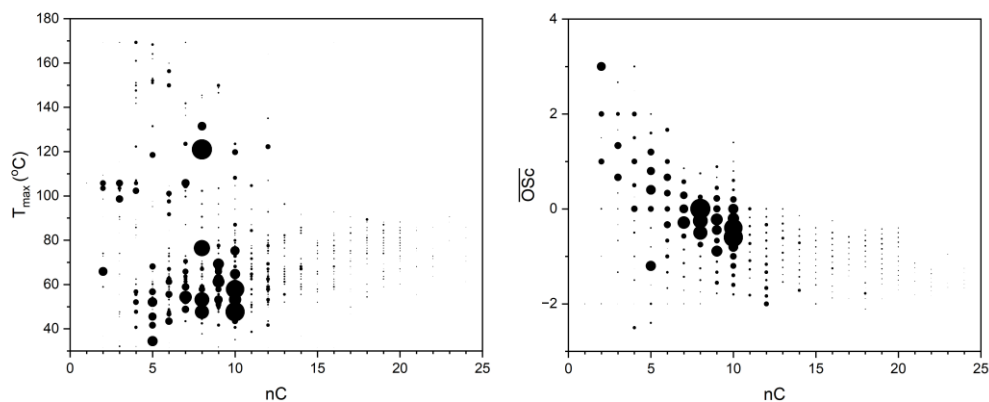

**Figure S2. (Left panel) Maximum desorption temperature ( $T_{\max}$ ) against carbon number (nC) and (right panel) average carbon oxidation states ( $\overline{OSc}$ ) against nC for all the particle-phase products for  $\alpha$ -pinene system. The marker size is proportional to the signal intensity. For CHO compounds, the  $\overline{OSc}$  is determined by the following equation (Kroll et al., 2011):  $\overline{OSc} = 2 \times O/C - H/C$ , where  $O/C$  and  $H/C$  represent the oxygen-to-carbon and hydrogen-to-carbon ratios, respectively. For CHON compounds, the  $\overline{OSc}$  is determined by:  $\overline{OSc} = 2 \times O/C - H/C - (\overline{OS_N} \times N/C)$ , where  $N/C$  is the nitrogen-to-carbon ratio. Following previous studies, if  $nO < 3$ ,  $\overline{OS_N} = 3$ ; if  $nO \geq 3$ ,  $\overline{OS_N} = 5$  (Shao et al., 2025).**

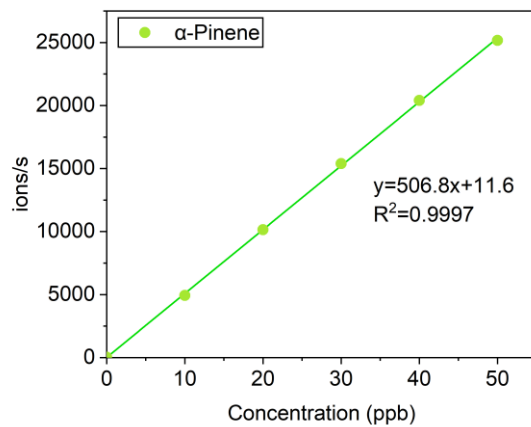

**Figure S3: Calibration curve for  $\alpha$ -pinene using Vocus PTR-ToF-MS (Experiment 3).**

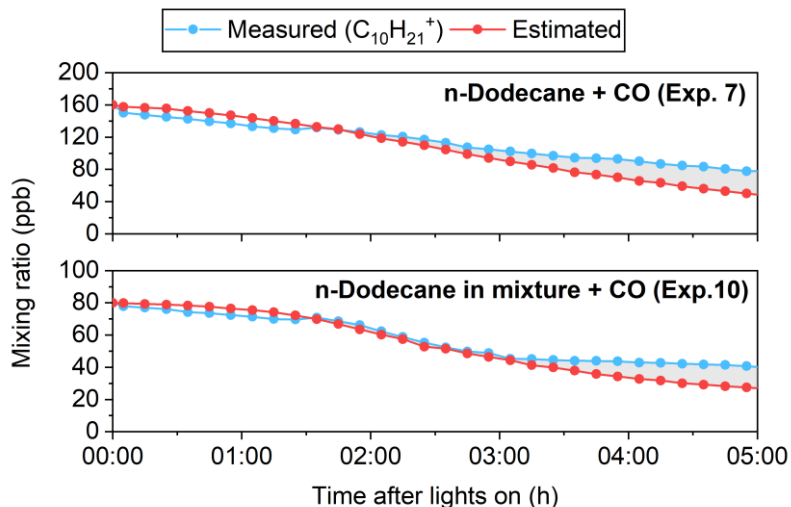

**Figure S4: Comparison of n-dodecane concentrations estimated from OH concentrations (derived from CO decay) with those measured directly from the  $C_{10}H_{21}^+$  fragment ion using Vocus PTR-ToF-MS.** Note: During the first three hours of the reaction, the differences between the measured and estimated values were small. However, as the reaction progressed, the  $C_{10}H_{21}^+$  signal may have been interfered with by other oxidation products, leading to an overestimation of the measured concentrations (grey shaded area). As a result, the SOA particle mass yields of n-dodecane and mixture may have been overestimated by up to ~30 % in this study. Nevertheless, the observed effects of CO on the overall trends and relative differences in yields remain reliable.

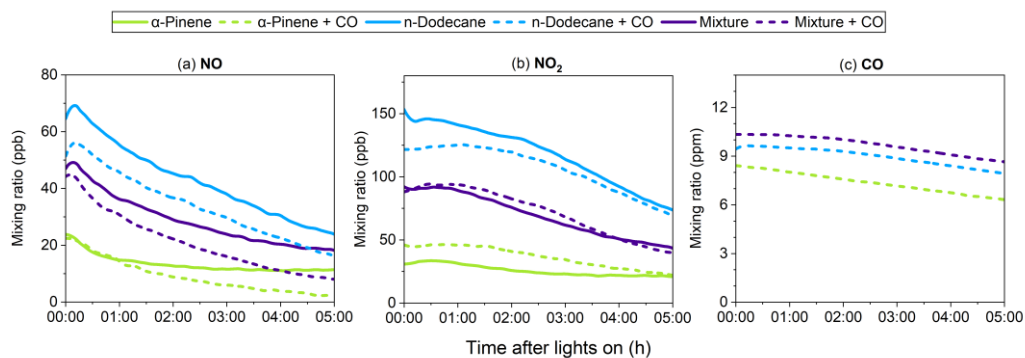

**Figure S5: Time series of NO, NO<sub>2</sub>, and CO in  $\alpha$ -pinene, n-dodecane, and mixture experiments conducted in the absence (solid lines) and presence (dashed lines) of CO.**

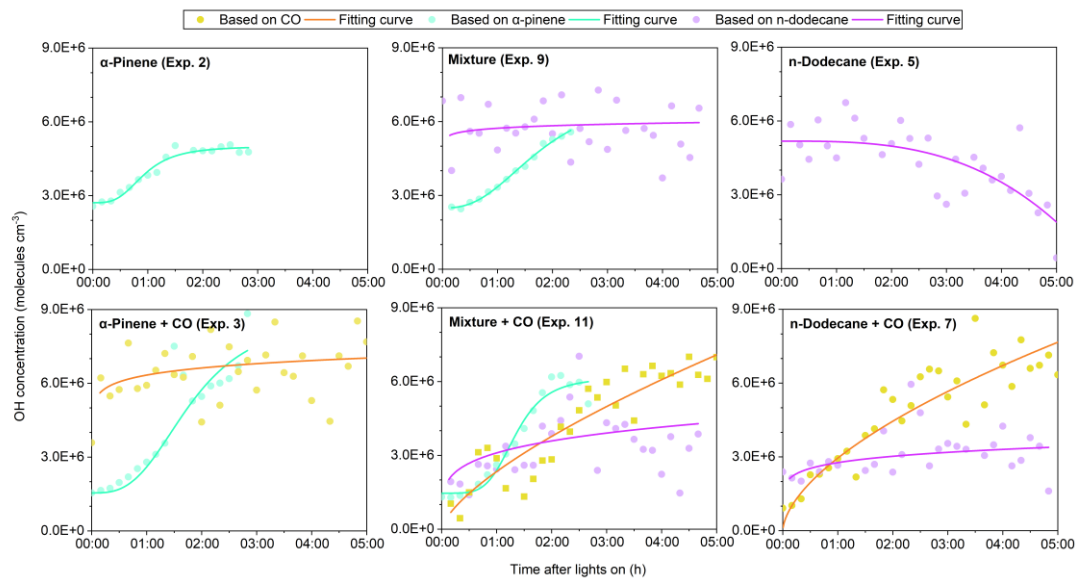

**Figure S6: Estimated OH concentrations derived from the decay of precursors or CO. Fitting curves are shown as a visual guide. Data are from representative experiments.**

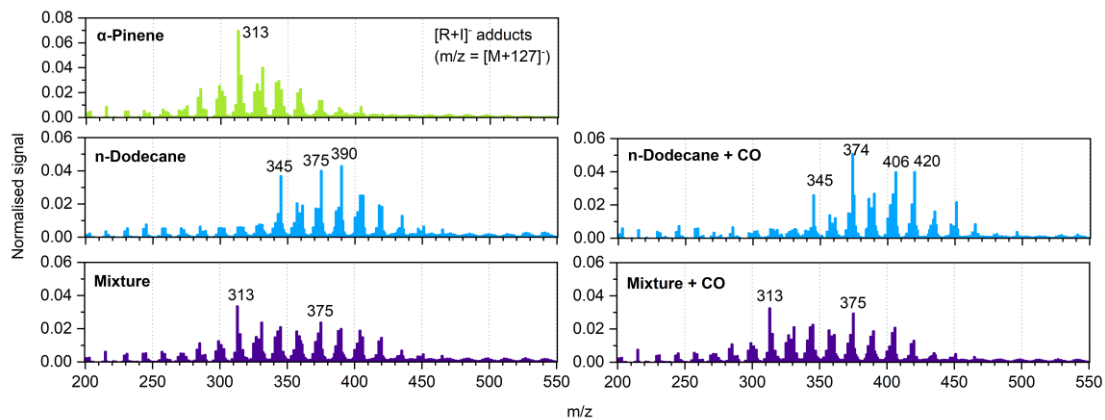

**Figure S7: Unit mass resolution (UMR) spectra of SOA particles from  $\alpha$ -pinene, n-dodecane and mixture experiments conducted in the absence and presence of CO (last FIGAERO cycle). Signal intensities are normalised to 1.**

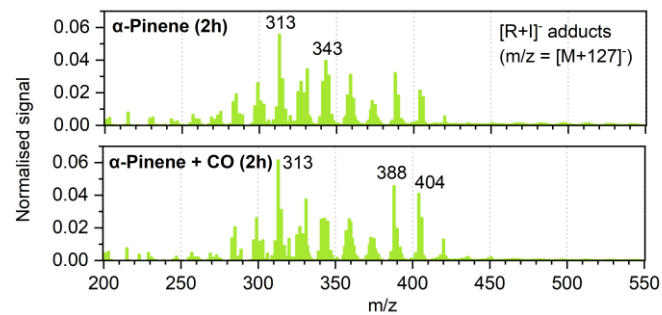

**Figure S8: Unit mass resolution (UMR) spectra of SOA particles from  $\alpha$ -pinene experiments conducted in the absence and presence of CO (second FIGAERO cycle). Signal intensities are normalised to 1.**

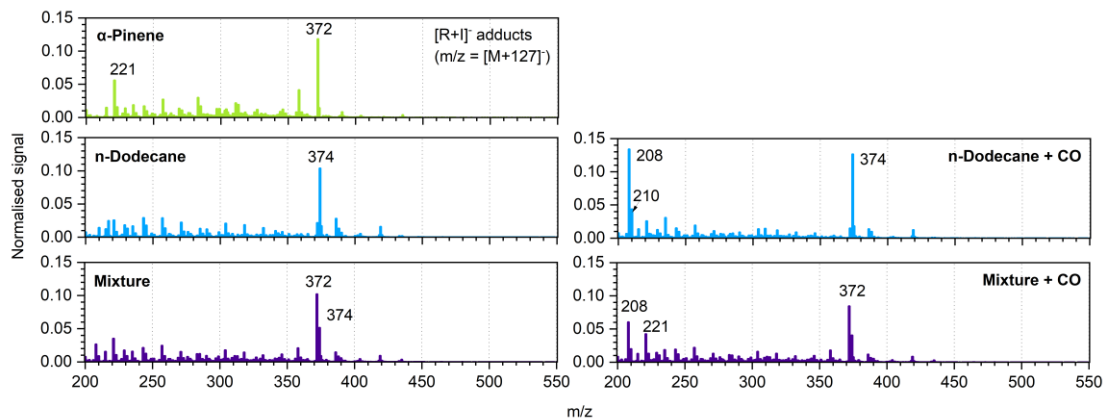

**Figure S9: Unit mass resolution (UMR) spectra of gas-phase products from  $\alpha$ -pinene, n-dodecane and mixture experiments conducted in the absence and presence of CO (last FIGAERO cycle). Signal intensities are normalised to 1.**

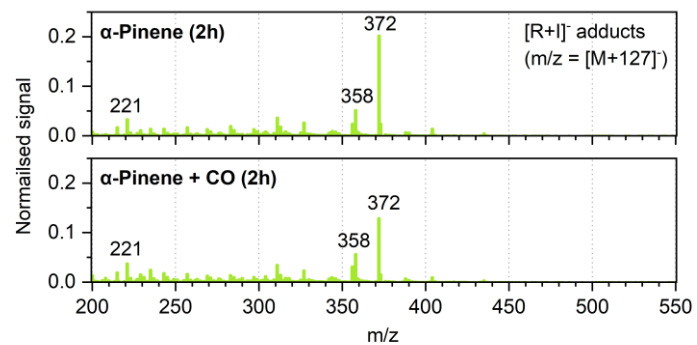

**Figure S10: Unit mass resolution (UMR) spectra of gas-phase products from  $\alpha$ -pinene experiments conducted in the absence and presence of CO (second FIGAERO cycle). Signal intensities are normalised to 1.**

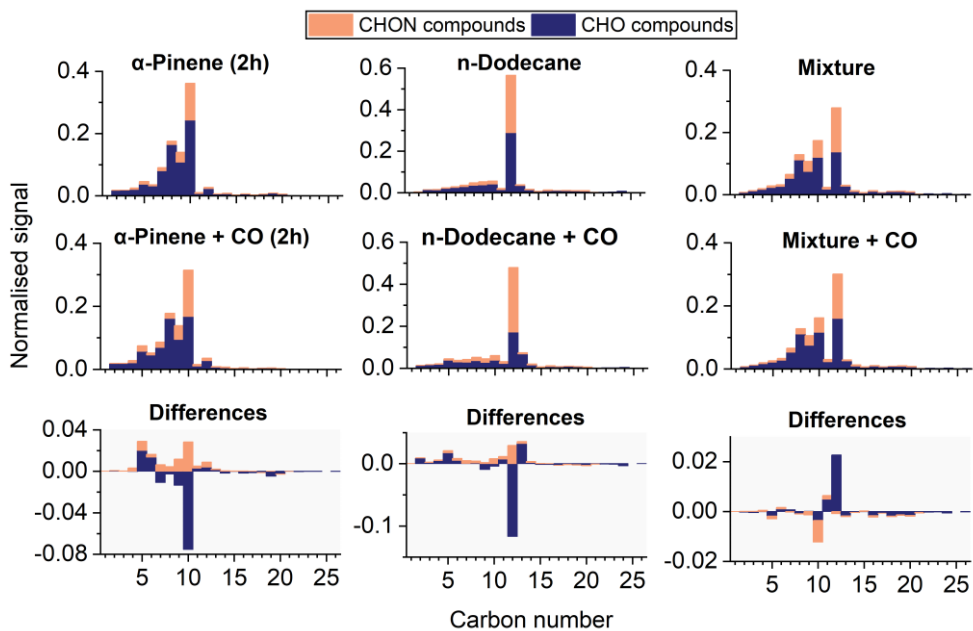

**Figure S11: Carbon number distributions of particle-phase SOA compounds from  $\alpha$ -pinene, n-dodecane, and their mixture, in the absence and presence of CO. The bottom panels show the differences between the CO-present and CO-absent experiments.**

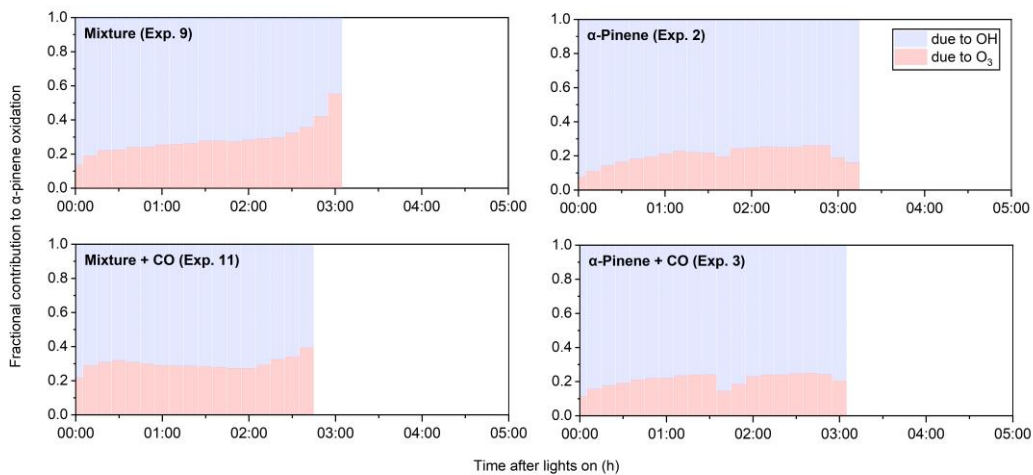

**Figure S12: Relative contributions of O<sub>3</sub> and OH to α-pinene oxidation. These contributions are calculated based on the relative magnitudes of  $k_{\text{VOC}+\text{O}_3}[\text{VOC}]_i[\text{O}_3]$  and  $k_{\text{VOC}+\text{OH}}[\text{VOC}]_i[\text{OH}]$ . Data are from representative experiments.**

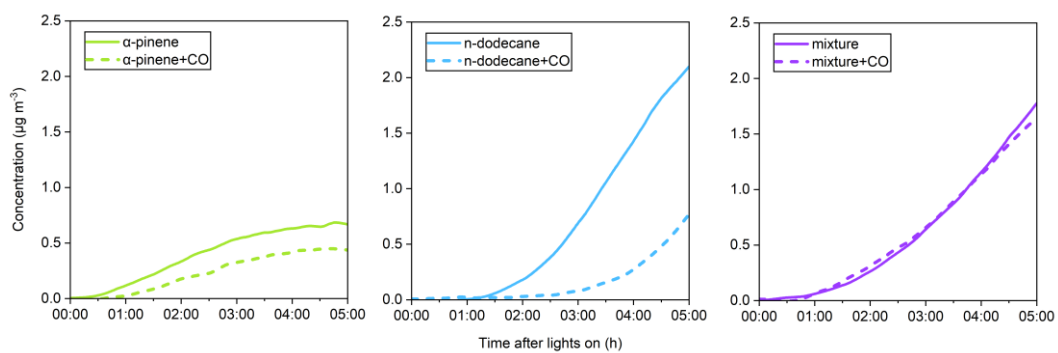

**Figure S13: The concentration of organic nitrates estimated from AMS measurements.**

## References

- Atkinson, R.: Kinetics of the gas-phase reactions of OH radicals with alkanes and cycloalkanes, *Atmos. Chem. Phys.*, 3, 2233-2307, <http://doi.org/10.5194/acp-3-2233-2003>, 2003.
- Cox, R.A., Ammann, M., Crowley, J.N., Herrmann, H., Jenkin, M.E., McNeill, V.F., Mellouki, A., Troe, J. and Wallington, T.J.: Evaluated kinetic and photochemical data for atmospheric chemistry: Volume VII – Criegee intermediates, *Atmos. Chem. Phys.*, 20, 13497-13519, <http://doi.org/10.5194/acp-20-13497-2020>, 2020.
- Dash, M.R., Balaganesh, M. and Rajakumar, B.: Rate coefficients for the gas-phase reaction of OH radical with  $\alpha$ -pinene: an experimental and computational study, *Mol. Phys.*, 112, 1495-1511, <http://doi.org/10.1080/00268976.2013.840395>, 2014.
- Kroll, J.H., Donahue, N.M., Jimenez, J.L., Kessler, S.H., Canagaratna, M.R., Wilson, K.R., Altieri, K.E., Mazzoleni, L.R., Wozniak, A.S., Bluhm, H., Mysak, E.R., Smith, J.D., Kolb, C.E. and Worsnop, D.R.: Carbon oxidation state as a metric for describing the chemistry of atmospheric organic aerosol, *Nat. Chem.*, 3, 133-139, <http://doi.org/10.1038/nchem.948>, 2011.
- Shao, Y., Voliotis, A., Du, M., Wang, Y., Bannan, T.J., Hamilton, J.F., Alfarra, M.R. and McFiggans, G.: The evolution of carbon oxidation state during secondary organic aerosol formation from individual and mixed organic precursors, *Aerosol Res.*, 3, 619-636, <http://doi.org/10.5194/ar-3-619-2025>, 2025.
